# Supplementary material for: Identification of a master transcription factor and a regulatory mechanism for desiccation tolerance in the anhydrobiotic cell line Pv11
Source: PLoS One. 2020 Mar 19;15(3):e0230218. doi: 10.1371/journal.pone.0230218 (PMC7082025; doi:10.1371/journal.pone.0230218)
Supplement: S1 Table — (XLSX) [file pone.0230218.s001.xlsx]

## Sheet: Sheet1
S1 Table: Results of mapping for each sample.
Sample Name	Mapped Reads	Unmapped Reads	Mapping Rate(%)	Sample Name	Mapped Reads	Unmapped Reads	Mapping Rate(%)
Trehalose Treatment				Rehydration
T0 1	8487568	506228	94.3	R0 1	12068620	887506	93.1
T0 2	11803186	675649	94.6	R0 2	11406662	711955	94.1
T0 3	20835951	1129919	94.9	R0 3	11676711	810103	93.5
T12 1	15369827	797712	95.1	R3 1	8056810	5558020	59.2
T12 2	9602418	505249	95	R3 2	8680054	5349949	61.9
T12 3	14969341	833484	94.7	R3 3	7208915	5951408	54.8
T24 1	12381278	661013	94.9	R12 1	12569469	2043604	86
T24 2	14396344	739811	95.1	R12 2	10011663	2667331	79
T24 3	21654754	1082941	95.2	R12 3	12482169	2976002	80.7
T36 1	10926300	547389	95.2	R24 1	11676557	1838090	86.4
T36 2	10975957	610096	94.7	R24 2	11893539	1532843	88.6
T36 3	14512336	739135	95.2	R24 3	12235718	1426672	89.6
T48 1	22602049	1055999	95.5	R72 1	13576009	900856	93.8
T48 2	18609332	872098	95.5	R72 2	12966806	827886	94
T48 3	8794809	408010	95.6	R72 3	10530947	698720	93.8
