# Supplementary material for: Identification of a master transcription factor and a regulatory mechanism for desiccation tolerance in the anhydrobiotic cell line Pv11
Source: PLoS One. 2020 Mar 19;15(3):e0230218. doi: 10.1371/journal.pone.0230218 (PMC7082025; doi:10.1371/journal.pone.0230218)
Supplement: S4 Data — (XLSX) [file pone.0230218.s006.xlsx]

## Sheet: Data4
S4 Data : BLASTN results for the known anhydrobiosis-related genes annotated in a previous study, Gusev, Oleg, et al. Nature Communications 5 (2014): 4784 vs. genes of P. vanderplanki annotated in a previous study, Mazin et al. Proceedings of the National Academy of Sciences USA 115.10 (2018): E2477-E2486, and the module for each gene.
Pv Gene ID (Nat.Commun)	Pv Gene Name	Family Name	Pv Gene ID (PNAS)	pident	length	mismatch	gapopen	qstart	qend	sstart	send	evalue	bitscore	Belonged Module
Pv.17398	PvLea1	LEA	PvG031548.t1	100	1176	0	0	514	1689	388	1563	0	2172	Cyan
Pv.17402	PvLea2	LEA	PvG031560.t1	100	540	0	0	1	540	1	540	0	998	Brown
Pv.17394	PvLea3	LEA	PvG031534.t1	100	1452	0	0	1	1452	1	1452	0	2682	Turquoise
Pv.17383	PvLea4	LEA	PvG031556.t1	100	429	0	0	1	429	1	429	0	793	Pink
Pv.11684	PvLea5	LEA	PvG022824.t1	100	789	0	0	1	789	1	789	0	1458	Cyan
Pv.11683	PvLea6	LEA	PvG022823.t1	100	432	0	0	1	432	166	597	0	798	Turquoise
Pv.17384	PvLea7	LEA	PvG031557.t1	100	600	0	0	1	600	1	600	0	1109	Light green
Pv.17381	PvLea8	LEA	PvG031555.t1	100	477	0	0	1	477	1	477	0	881	Brown
Pv.02068	PvLea9	LEA	PvG013521.t1	100	273	0	0	1	273	1	273	3.55e-142	505	Grey60
Pv.14169	PvLea10	LEA	PvG006782.t1	100	312	0	0	103	414	1	312	1.16e-163	577	Black
Pv.17380	PvLea11	LEA	PvG031520.t1	100	339	0	0	430	768	1	339	2.17e-178	627	Turquoise
Pv.02067	PvLea12	LEA	PvG013520.t1	100	305	0	0	230	534	56	360	1.18e-159	564	Grey60
Pv.14169	PvLea13	LEA	PvG006782.t1	100	312	0	0	103	414	1	312	1.16e-163	577	Black
Pv.02066	PvLea15	LEA	PvG013518.t1	100	252	0	0	1	252	1	252	1.54e-130	466	Yellow
Pv.02067	PvLea16	LEA	PvG013520.t1	100	305	0	0	230	534	56	360	1.18e-159	564	Grey60
Pv.02065	PvLea19	LEA	PvG034100.t1	86.154	195	27	0	1	195	1	195	6.05e-54	211	Green yellow
Pv.17407	PvLea21	LEA	PvG031563.t1	100	504	0	0	154	657	1	504	0	931	Black
Pv.17408	PvLea22	LEA	PvG031565.t1	100	480	0	0	328	807	1	480	0	887	Black
Pv.14794	PvLea27	LEA	PvG011525.t1	100	210	0	0	1	210	1	210	2.79e-107	388	Royal blue
Pv.00404	PvTrx1-1	TRX	PvG002757.t1	100	408	0	0	1	408	1	408	0	754	Red
Pv.06051	PvTrx-1-2	TRX	PvG027906.t3	100	342	0	0	1	342	1	342	1.99e-180	632	Black
Pv.07218	PvTrx2	TRX	PvG035304.t1	100	321	0	0	1	321	1	321	8.77e-169	593	Turquoise
Pv.06474	PvTrx3	TRX	PvG029410.t33	100	414	0	0	58	471	1	414	0	765	Royal blue
Pv.07501	PvTrx4	TRX	PvG000484.t1	100	2414	0	0	1	2414	1	2414	0	4458	Brown
Pv.07502	PvTrx5	TRX	PvG000486.t1	100	420	0	0	1	420	1	420	0	776	Pink
Pv.07503	PvTrx6	TRX	PvG000487.t1	100	444	0	0	1	444	1	444	0	821	Grey60
Pv.07504	PvTrx7	TRX	PvG000488.t1	100	345	0	0	1	345	1	345	0	638	Grey60
Pv.07505	PvTrx8	TRX	PvG000489.t1	100	345	0	0	1	345	1	345	0	638	Dark red
Pv.07506	PvTrx9	TRX	PvG000490.t1	100	327	0	0	1	327	1	327	4.5e-172	604	Pink
Pv.07507	PvTrx10	TRX	PvG000491.t1	100	336	0	0	1	336	1	336	4.23e-177	621	Green
Pv.07509	PvTrx11	TRX	PvG000492.t1	100	357	0	0	1	357	1	357	0	660	Green
Pv.07510	PvTrx12	TRX	PvG000493.t1	100	411	0	0	1	411	1	411	0	760	Dark red
Pv.07511	PvTrx13	TRX	PvG000494.t1	100	459	0	0	1	459	1	459	0	848	Black
Pv.07512	PvTrx14	TRX	PvG000495.t1	100	390	0	0	1	390	52	441	0	721	Dark red
Pv.07513	PvTrx15	TRX	PvG000496.t1	100	450	0	0	1	450	1	450	0	832	Grey60
Pv.07514	PvTrx16	TRX	PvG000497.t2	100	333	0	0	1	333	1	333	1.95e-175	616	Green
Pv.07515	PvTrx17	TRX	PvG000498.t1	100	399	0	0	1	399	1	399	0	737	Green yellow
Pv.07516	PvTrx18	TRX	PvG000499.t1	100	396	0	0	1	396	1	396	0	732	Green yellow
Pv.07517	PvTrx19	TRX	PvG000500.t1	100	399	0	0	1	399	1	399	0	737	Yellow
Pv.07518	PvTrx20	TRX	PvG000501.t1	100	396	0	0	1	396	1	396	0	732	Green yellow
Pv.07521	PvTrx21	TRX	PvG000502.t1	100	336	0	0	1	336	1	336	4.23e-177	621	Cyan
Pv.07522	PvTrx22	TRX	PvG000503.t1	100	333	0	0	1	333	1	333	1.95e-175	616	Green
Pv.05979	PvTrx23	TRX	PvG027721.t1	100	342	0	0	1	342	1	342	1.99e-180	632	Green yellow
Pv.05980	PvTrx24	TRX	PvG027722.t1	98.667	375	5	0	250	624	1	375	0	665	NonDEG
Pv.12353	PvPimt-1	PIMT	PvG027152.t3	100	687	0	0	1	687	91	777	0	1269	Blue
Pv.07097	PvPimt-2	PIMT	PvG034374.t1	100	693	0	0	1	693	1	693	0	1280	Turquoise
Pv.07096	PvPimt-3	PIMT	PvG034373.t1	100	828	0	0	1	828	1	828	0	1530	Dark red
Pv.07094	PvPimt-4	PIMT	PvG034372.t2	100	969	0	0	1	969	1	969	0	1790	Dark red
Pv.07093	PvPimt-5	PIMT	PvG034371.t2	100	960	0	0	1	960	1	960	0	1773	Dark red
Pv.15166	PvPimt-6	PIMT	PvG014191.t1	100	975	0	0	1	975	1	975	0	1801	Grey60
Pv.02889	PvPimt-7	PIMT	PvG016452.t2	100	640	0	0	54	693	78	717	0	1182	Dark red
Pv.02888	PvPimt-8	PIMT	PvG016451.t1	100	631	0	0	1	631	1	631	0	1166	Pink
Pv.02887	PvPimt-9	PIMT	PvG016449.t1	100	693	0	0	1	693	106	798	0	1280	Dark red
Pv.02886	PvPimt-10	PIMT	PvG016448.t1	100	690	0	0	1	690	1	690	0	1275	Dark red
Pv.15972	PvPimt-11	PIMT	PvG021832.t1	100	690	0	0	1	690	1	690	0	1275	Orange
Pv.02885	PvPimt-12	PIMT	PvG016447.t4	100	345	0	0	1	345	1	345	0	638	Dark red
Pv.02884	PvPimt-13	PIMT	PvG016446.t1	100	693	0	0	1	693	1	693	0	1280	Dark red
Pv.02883	PvPimt-14	PIMT	PvG016445.t1	100	696	0	0	1	696	1	696	0	1286	Purple
Pv.10438	PvHb1	HB	PvG015630.t1	100	378	0	0	133	510	1	378	0	699	NonDEG
Pv.11313	PvHb2	HB	PvG020267.t1	100	510	0	0	1	510	1	510	0	942	NonDEG
Pv.11312	PvHb3	HB	PvG020266.t1	100	516	0	0	1	516	1	516	0	953	NonDEG
Pv.11311	PvHb4	HB	PvG020265.t1	100	510	0	0	1	510	58	567	0	942	NonDEG
Pv.10438	PvHb5	HB	PvG015630.t1	100	378	0	0	133	510	1	378	0	699	NonDEG
Pv.14334	PvHb6	HB	PvG008007.t1	100	411	0	0	100	510	1	411	0	760	NonDEG
Pv.12043	PvHb7	HB	PvG025461.t11	100	474	0	0	784	1257	37	510	0	876	Tan
Pv.07497	PvHb8	HB	PvG000554.t1	100	483	0	0	1	483	1	483	0	893	NonDEG
Pv.10438	PvHb10	HB	PvG015630.t1	100	378	0	0	133	510	1	378	0	699	NonDEG
Pv.03004	PvHb11	HB	PvG016827.t1	100	498	0	0	1	498	136	633	0	920	NonDEG
Pv.03005	PvHb12	HB	PvG016823.t1	100	486	0	0	1	486	1	486	0	898	NonDEG
Pv.02995	PvHb13	HB	PvG016818.t1	100	480	0	0	1	480	1	480	0	887	NonDEG
Pv.02997	PvHb15	HB	PvG016826.t1	100	480	0	0	82	561	1	480	0	887	NonDEG
Pv.02998	PvHb16	HB	PvG027547.t1	90.851	470	43	0	1	470	1	470	1.03e-179	630	NonDEG
Pv.02999	PvHb17	HB	PvG016819.t1	100	504	0	0	31	534	1	504	0	931	NonDEG
Pv.14636	PvHb18	HB	PvG010544.t1	100	441	0	0	1	441	1	441	0	815	NonDEG
Pv.12393	PvHb19	HB	PvG027549.t1	100	480	0	0	1	480	1	480	0	887	NonDEG
Pv.12394	PvHb20	HB	PvG027547.t1	100	480	0	0	1	480	1	480	0	887	NonDEG
Pv.00647	PvHb21	HB	PvG003596.t1	100	514	0	0	405	918	9	522	0	950	NonDEG
Pv.00647	PvHb22	HB	PvG003596.t1	100	514	0	0	405	918	9	522	0	950	NonDEG
Pv.03001	PvHb23	HB	PvG016821.t1	100	386	0	0	20	405	221	606	0	713	NonDEG
Pv.03002	PvHb24	HB	PvG016822.t1	82.549	510	86	3	1	507	1	510	4.26e-124	446	NonDEG
Pv.03003	PvHb25	HB	PvG016822.t1	100	513	0	0	1	513	1	513	0	948	NonDEG
Pv.12395	PvHb26	HB	PvG027548.t1	100	480	0	0	1	480	1	480	0	887	NonDEG
Pv.02770	PvHb27	HB	PvG015315.t1	100	468	0	0	1	468	1	468	0	865	NonDEG
Pv.12395	PvHb28	HB	PvG027548.t1	100	480	0	0	1	480	1	480	0	887	NonDEG
Pv.11625	PvHb29	HB	PvG022474.t1	100	432	0	0	1	432	19	450	0	798	Salmon
Pv.10438	PvHb30	HB	PvG015630.t1	100	378	0	0	133	510	1	378	0	699	NonDEG
Pv.00646	PvHb31	HB	PvG003595.t1	100	501	0	0	1	501	1	501	0	926	NonDEG
Pv.03000	PvHb32	HB	PvG016803.t1	99.767	430	1	0	393	822	138	567	0	785	NonDEG
Pv.03001	PvHb33	HB	PvG016821.t1	100	386	0	0	20	405	221	606	0	713	NonDEG
Pv.02641	Aqp1	AQP	PvG014689.t2	100	591	0	0	1	591	193	783	0	1092	Black
Pv.04131	Aqp2	AQP	PvG021641.t1	100	738	0	0	805	1542	1	738	0	1363	Black
Pv.09325	Aqp3	AQP	PvG008518.t1	100	744	0	0	1	744	1	744	0	1375	NonDEG
Pv.09326	Aqp4	AQP	PvG008519.t2	100	783	0	0	1	783	1	783	0	1447	NonDEG
Pv.02642	Aqp5	AQP	PvG014565.t3	100	710	0	0	38	747	2	711	0	1312	NonDEG
Pv.05105	Tret1	TrehaloseRelated	PvG024846.t1	100	1473	0	0	1	1473	1	1473	0	2721	Salmon
Pv.10180	Tpp	TrehaloseRelated	PvG012714.t2	100	780	0	0	1	780	175	954	0	1441	Black
Pv.10178	Tps	TrehaloseRelated	PvG012704.t1	100	2538	0	0	1	2538	1	2538	0	4687	Grey60
Pv.10692	Treh	TrehaloseRelated	PvG016988.t2	100	1794	0	0	1	1794	1	1794	0	3314	Cyan
Pv.04176	RAD51B	DNARepair(HR)	PvG022022.t1	100	1032	0	0	1	1032	1	1032	0	1906	Magenta
Pv.02239	RAD50	DNARepair(HR)	PvG013792.t1	100	3930	0	0	1	3930	1	3930	0	7258	Pink
Pv.04176	RAD51	DNARepair(HR)	PvG022022.t1	100	1032	0	0	1	1032	1	1032	0	1906	Magenta
Pv.04176	XRCC3	DNARepair(HR)	PvG022022.t1	100	1032	0	0	1	1032	1	1032	0	1906	Magenta
Pv.04176	DMC1	DNARepair(HR)	PvG022022.t1	100	1032	0	0	1	1032	1	1032	0	1906	Magenta
Pv.17500	RAD54B	DNARepair(HR)	PvG031761.t1	100	2457	0	0	1	2457	1	2457	0	4538	Turquoise
Pv.17500	RAD54L	DNARepair(HR)	PvG031761.t1	100	2457	0	0	1	2457	1	2457	0	4538	Turquoise
Pv.01579	PMS2	DNARepair(MMR)	PvG010407.t1	100	2643	0	0	1	2643	1	2643	0	4881	Red
Pv.01255	MLH1	DNARepair(MMR)	PvG008177.t1	100	1986	0	0	1	1986	1	1986	0	3668	Red
Pv.04368	MSH3	DNARepair(MMR)	PvG022335.t1	100	2643	0	0	1	2643	1	2643	0	4881	Blue
Pv.04368	MSH2	DNARepair(MMR)	PvG022335.t1	100	2643	0	0	1	2643	1	2643	0	4881	Blue
Pv.01579	PMS1	DNARepair(MMR)	PvG010407.t1	100	2643	0	0	1	2643	1	2643	0	4881	Red
Pv.01255	MLH3	DNARepair(MMR)	PvG008177.t1	100	1986	0	0	1	1986	1	1986	0	3668	Red
Pv.03510	MSH6	DNARepair(MMR)	PvG018795.t1	100	3247	0	0	1	3247	1	3247	0	5997	Turquoise
Pv.09938	MSH4	DNARepair(MMR)	PvG011154.t1	100	2778	0	0	1	2778	1	2778	0	5131	Pink
Pv.11067	MSH5	DNARepair(MMR)	PvG018970.t1	100	1849	0	0	1	1849	1	1849	0	3415	Green
Pv.03630	XPC	DNARepair(NER)	PvG019719.t2	100	1758	0	0	1	1758	1	1758	0	3243	Tan
Pv.03514	DDB1	DNARepair(NER)	PvG018798.t1	99.391	3450	0	1	1	3450	1	3429	0	6235	Pink
Pv.10801	XPA	DNARepair(NER)	PvG017164.t1	100	771	0	0	1	771	25	795	0	1424	NonDEG
Pv.12421	RPA2	DNARepair(NER)	PvG027864.t1	100	744	0	0	1	744	1	744	0	1375	Blue
Pv.11036	RAD23B	DNARepair(NER)	PvG018902.t1	100	1149	0	0	1	1149	100	1248	0	2122	Red
Pv.08488	CETN2	DNARepair(NER)	PvG004380.t1	100	522	0	0	1	522	1	522	0	965	Blue
Pv.05315	RPA1	DNARepair(NER)	PvG025429.t2	100	1839	0	0	1	1839	97	1935	0	3397	Blue
Pv.11036	RAD23A	DNARepair(NER)	PvG018902.t1	100	1149	0	0	1	1149	100	1248	0	2122	Red
Pv.17076	LIG1	DNARepair(NER)	PvG030845.t3	100	2012	0	0	347	2358	35	2046	0	3716	Light yellow
Pv.05614	ERCC2(XPD)	DNARepair(NER)	PvG026493.t1	100	2283	0	0	1	2283	1	2283	0	4217	Tan
Pv.05115	ERCC3(XPB)	DNARepair(NER)	PvG024944.t1	100	2310	0	0	1	2310	1	2310	0	4266	Green
Pv.04021	GTF2H3	DNARepair(NER)	PvG021435.t3	100	858	0	0	1	858	1	858	0	1585	Grey60
Pv.02663	MNAT1	DNARepair(NER)	PvG015031.t1	100	930	0	0	1	930	1	930	0	1718	Magenta
Pv.06241	GTF2H1	DNARepair(NER)	PvG028358.t1	100	1755	0	0	10	1764	1	1755	0	3241	Green
Pv.06540	CDK7	DNARepair(NER)	PvG029676.t1	100	1023	0	0	1	1023	1	1023	0	1890	Magenta
Pv.05985	GTF2H4	DNARepair(NER)	PvG027677.t1	100	1488	0	0	1	1488	1	1488	0	2748	Magenta
Pv.01131	GTF2H2	DNARepair(NER)	PvG007123.t1	100	1425	0	0	1	1425	1	1425	0	2628	Purple
Pv.01957	CCNH	DNARepair(NER)	PvG013203.t1	100	942	0	0	1	942	1	942	0	1740	Turquoise
Pv.05333	XRCC6(Ku70)	DNARepair(NHEJ)	PvG025594.t2	100	1255	0	0	1815	3069	36	1290	0	2318	Light Green
Pv.10272	XRCC5(Ku80)	DNARepair(NHEJ)	PvG014105.t1	100	1615	0	0	1	1615	1	1615	0	2983	Tan
Pv.15195	LIG4	DNARepair(NHEJ)	PvG014803.t3	100	2208	0	0	96	2303	9	2216	0	4071	Dark green
Pv.10442	PRKDC	DNARepair(NHEJ)	PvG015642.t1	100	2645	0	0	1	2645	49	2693	0	4881	Brown
